# Supplementary material for: Early experience of laparoscopic resection and comparison with open surgery for gastric gastrointestinal stromal tumor: a multicenter retrospective study
Source: PubMed Central journal article supplement (PMC8831629; doi:10.1038/s41598-022-05044-x), 2022-02-10
Supplement: 41598_2022_5044_MOESM1_ESM.pdf [file 41598_2022_5044_MOESM1_ESM.pdf]

## Supplementary Figures and Tables

### Early Experience of Laparoscopic Resection and Comparison with Open Surgery for Gastric Gastrointestinal Stromal Tumor: A Multicenter Retrospective Study

Journal Name: *Scientific Report*

Shin-Hoo Park, MD<sup>1</sup>, Hyuk-Joon Lee, PhD<sup>1,2,3,\*</sup>, Min-Chan Kim, PhD<sup>4</sup>, Jeong-Hwan Yook, PhD<sup>5</sup>, Tae-Sung Sohn, PhD<sup>6</sup>, Woo-Jin Hyung, PhD<sup>7</sup>, Seung-Wan Ryu, PhD<sup>8</sup>, Yukinori Kurokawa, PhD<sup>9</sup>, Young-Woo Kim, PhD<sup>10</sup>, Sang-Uk Han, PhD<sup>11</sup>, Hyung-Ho Kim, PhD<sup>12</sup>, Do-Joong Park, PhD<sup>1,2</sup>, Wook Kim, PhD<sup>13</sup>, Sang-Il Lee, PhD<sup>14</sup>, Haruhiko Cho, PhD<sup>15,16</sup>, Gyu-Seok Cho, PhD<sup>17</sup>, Jin-Jo Kim, PhD<sup>18</sup>, Ki-Han Kim, PhD<sup>4</sup>, Moon-Won Yoo, PhD<sup>5</sup>, Han-Kwang Yang, PhD<sup>1,2,3</sup>

<sup>1</sup>Department of Surgery, Seoul National University College of Medicine, Seoul, Korea

<sup>2</sup>Department of Surgery, Seoul National University Hospital, Seoul, Korea

<sup>3</sup>Cancer Research Institute, Seoul National University College of Medicine, Seoul, Korea

<sup>4</sup>Department of Surgery, Dong-A University College of Medicine, Busan, Korea

<sup>5</sup>Department of Surgery, University of Ulsan College of Medicine, Seoul, Korea

<sup>6</sup>Department of Surgery, Sungkyunkwan University School of Medicine, Samsung Medical Center, Seoul, Korea

<sup>7</sup>Department of Surgery, Yonsei University Health System, Yonsei University College of Medicine, Seoul, Korea

<sup>8</sup>Department of Surgery, Keimyung University School of Medicine, Seoul, Korea

<sup>9</sup>Department of Gastroenterological Surgery, Graduate School of Medicine, Osaka University, Osaka, Japan

<sup>10</sup>Center for Gastric Cancer, National Cancer Center, Seoul, Korea

<sup>11</sup>Department of Surgery, School of Medicine, Ajou University, Suwon, Korea

<sup>12</sup>Department of Surgery, Seoul National University Bundang Hospital, Seoul, Korea

<sup>13</sup>Department of Surgery, Yeouido St. Mary's Hospital, College of Medicine, The Catholic University of Korea, Seoul, Korea

<sup>14</sup>Department of Surgery, Chungnam National University Hospital, Seoul, Korea

<sup>15</sup>Department of Gastrointestinal Surgery, Kanagawa Cancer Center, Japan

<sup>16</sup>Department of Surgery, Tokyo Metropolitan Cancer and Infectious Diseases Center, Komagome Hospital.

<sup>17</sup>Department of Surgery, Soonchunhyang University College of Medicine, Seoul, Korea

<sup>18</sup>Division of Gastrointestinal Surgery, Department of Surgery, Incheon St. Mary's Hospital, The Catholic University of Korea, Seoul, Korea

**Corresponding author:** Hyuk-Joon Lee, M.D., Ph.D.

Department of Surgery, Seoul National University College of Medicine

Cancer Research Institute, Seoul National University College of Medicine

101 Daehak-ro, Jongno-gu, Seoul, 03080, Korea

Tel: +82-2-2072-1957

Fax: +82-2-766-3975

E-mail: [appe98@snu.ac.kr](mailto:appe98@snu.ac.kr)

**Running title:** Laparoscopic surgery for gastric GIST

**Supplementary figure 1.** Bar graph of annually performed laparoscopic and open surgery for patients with gastric GIST between year 2000 and year 2007, before and after matching.

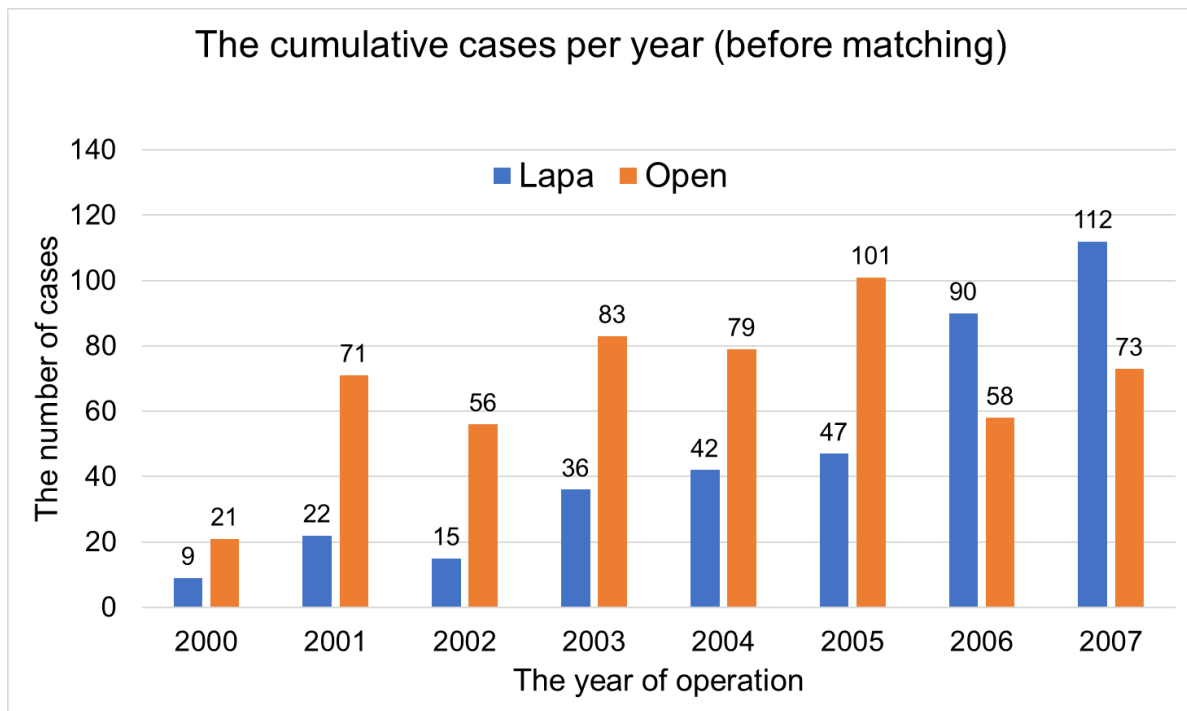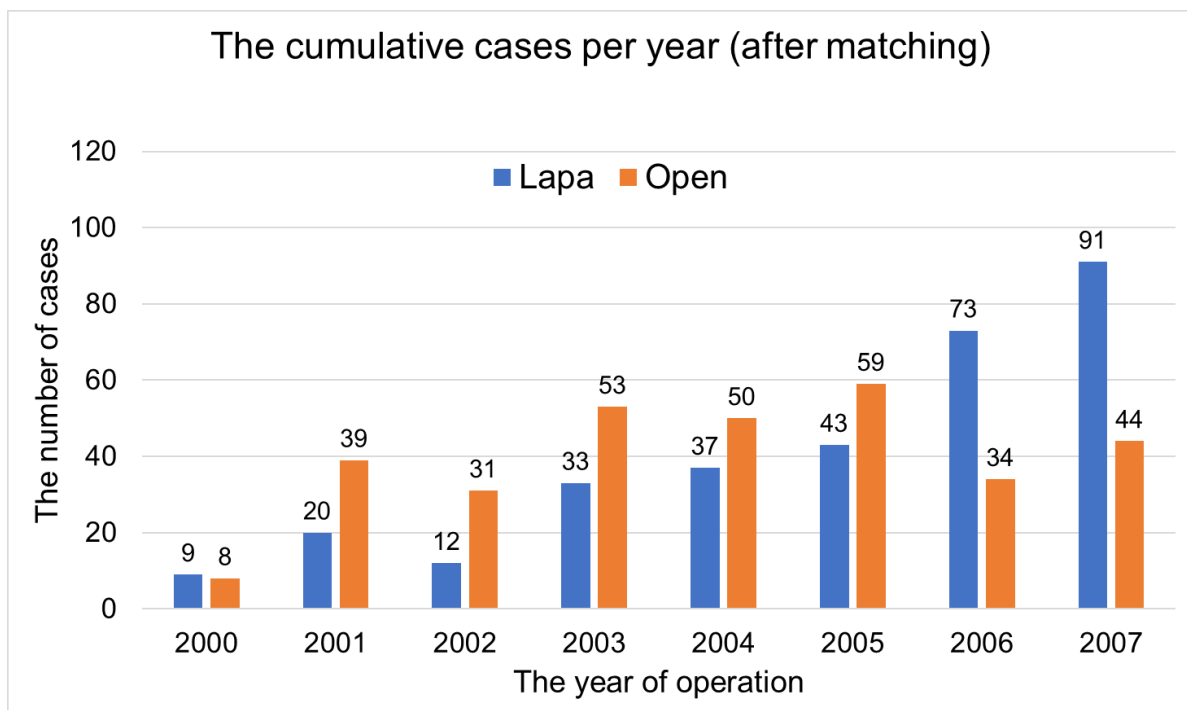

**Supplementary figure 2.**

- a. Plot of absolute standardized mean differences of covariates before and after 1:1 propensity score matching.  
 b. Distribution of propensity scores in the laparoscopic versus open group before and after 1:1 score matching.

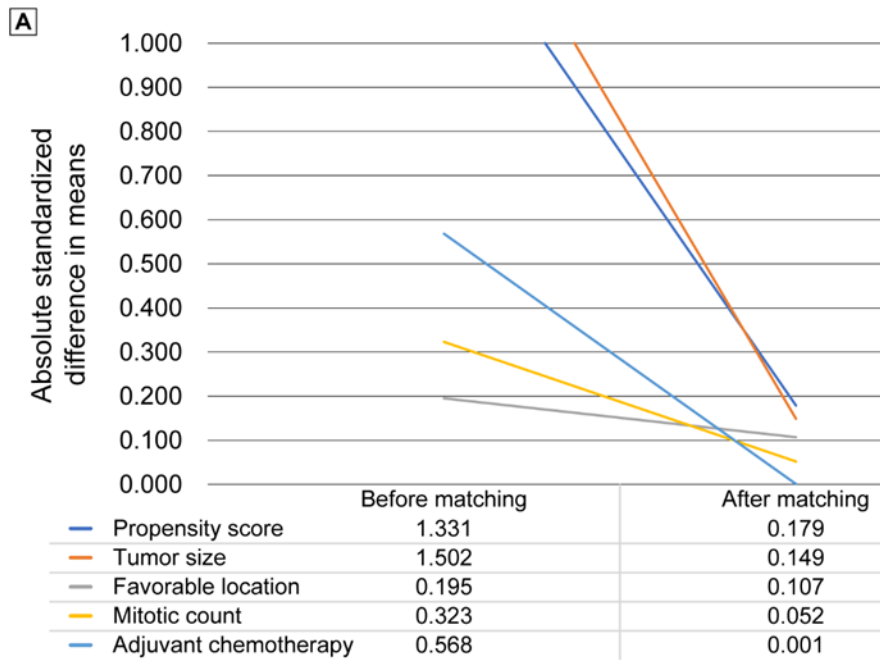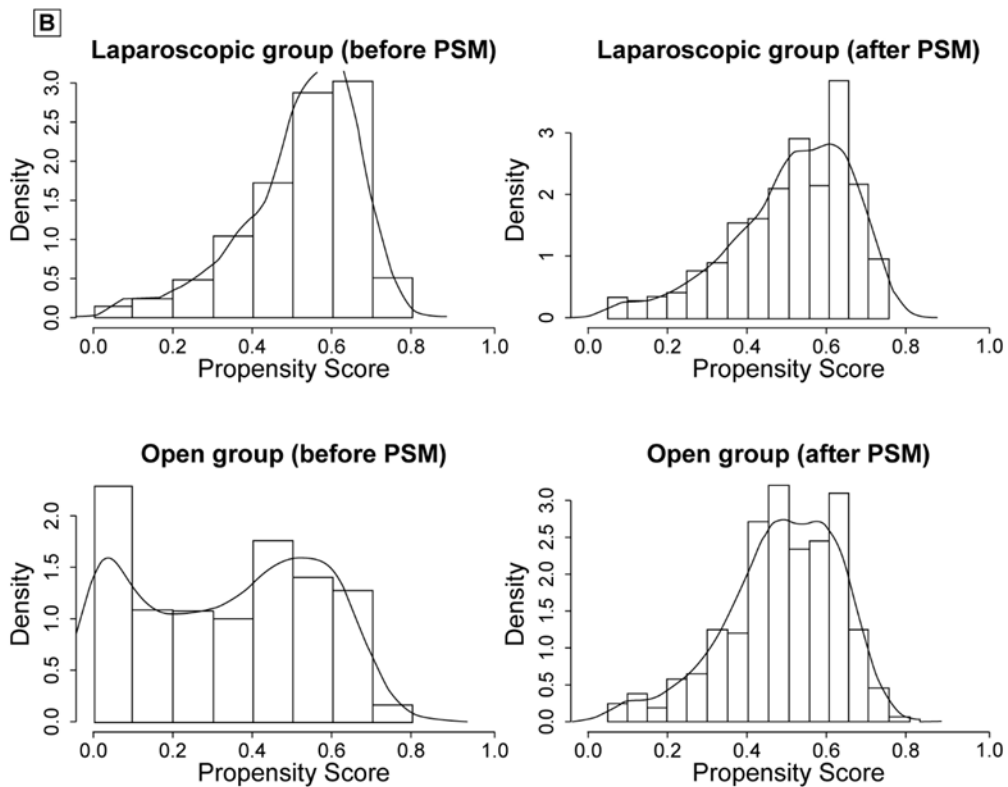

**Supplementary Table 1.** Cases that required conversion to open surgery during laparoscopic resection of gastric gastrointestinal stromal tumor.

| Case number | Age | Sex | BMI  | Tumor size | Location        |                   | Preferences | Reason for conversion to open surgery                                                                              |
|-------------|-----|-----|------|------------|-----------------|-------------------|-------------|--------------------------------------------------------------------------------------------------------------------|
|             |     |     |      |            | Longitudinal    | Circumferential   |             |                                                                                                                    |
| Case 1      | 59  | F   | 22.8 | 70.0       | Middle third    | Lesser curvature  | Unfavorable | Difficulty in handling large tumor with laparoscopic instrument                                                    |
| Case 2      | 74  | M   | 26.0 | 30.0       | Upper third     | Posterior wall    | Unfavorable | Difficulty in approaching the location of tumor                                                                    |
| Case 3      | 69  | F   | 36.0 | 32.0       | Upper third     | Greater curvature | Favorable   | Severe adhesion due to previous abdominal surgery                                                                  |
| Case 4      | 73  | M   | 27.1 | 60.0       | Upper third     | Posterior wall    | Unfavorable | Difficulty in handling large tumor with laparoscopic instrument                                                    |
| Case 5      | 46  | F   | 24.6 | 80.0       | GEJ to Cardia   | Anterior wall     | Unfavorable | Difficulty in handling large tumor with laparoscopic instrument<br>Difficulty in approaching the location of tumor |
| Case 6      | 37  | M   | 25.0 | 130.0      | Upper to middle | Greater curvature | Favorable   | Difficulty in handling large tumor with laparoscopic instrument                                                    |
| Case 7      | 71  | M   | 27.5 | 37.0       | Middle third    | Posterior wall    | Unfavorable | Inflammatory adhesion to adjacent organs                                                                           |
| Case 8      | 60  | M   | 22.5 | 70.0       | GEJ to Cardia   | Lesser curvature  | Unfavorable | Difficulty in handling large tumor with laparoscopic instrument<br>Difficulty in approaching the location of tumor |
| Case 9      | 77  | M   | 27.0 | 75.0       | Upper third     | Greater curvature | Favorable   | Difficulty in handling large tumor with laparoscopic instrument                                                    |
| Case 10     | 66  | F   | 26.7 | 15.0       | Lower third     | Greater curvature | Favorable   | Inflammatory adhesion to adjacent organs                                                                           |

|         |    |   |      |      |               |                |             |                                                   |
|---------|----|---|------|------|---------------|----------------|-------------|---------------------------------------------------|
| Case 11 | 40 | M | 22.1 | 10.0 | GEJ to Cardia | Posterior wall | Unfavorable | Difficulty in approaching the location of tumor   |
| Case 12 | 54 | F | 18.2 | 35.0 | Lower third   | Anterior wall  | Favorable   | Inflammatory adhesion to adjacent organs          |
| Case 13 | 63 | M | 27.5 | 38.0 | GEJ to Cardia | Anterior wall  | Unfavorable | Difficulty in approaching the location of tumor   |
| Case 14 | 49 | M | 23.7 | 45.0 | Upper third   | Anterior wall  | Favorable   | Severe adhesion due to previous abdominal surgery |

---

\*TNM stage according to AJCC, the 7<sup>th</sup> edition.

**Supplementary Table 2.** Conversion to open surgery in laparoscopic resection

|                              | Laparoscopic group before PSM |             | <i>P</i> value | Laparoscopic group after PSM |             | <i>P</i> value |
|------------------------------|-------------------------------|-------------|----------------|------------------------------|-------------|----------------|
|                              | (N = 373)                     |             |                | (N = 318)                    |             |                |
| <b>Tumor size (cm)</b>       | Size ≤ 5 cm                   | Size > 5cm  |                | Size ≤ 5 cm                  | Size > 5cm  |                |
|                              | (N = 310)                     | (N = 64)    |                | (N = 254)                    | (N = 64)    |                |
| Conversion case (%)          | 8 (2.6)                       | 6 (9.4)     | 0.020          | 5 (2.0)                      | 6 (9.4)     | 0.011          |
| <b>Locational preference</b> | Favorable                     | Unfavorable |                | Favorable                    | Unfavorable |                |
|                              | (N=176)                       | (N=197)     |                | (N = 145)                    | (N = 173)   |                |
| Conversion case (%)          | 7 (4.0)                       | 7 (3.6)     | 0.830          | 3 (2.1)                      | 8 (4.6)     | 0.356          |

Abbreviations: PSM propensity score matching

**Supplementary Table 3.** Univariate and multivariate logistic regression analysis for variables to predict the overall complications. Covariates were age, sex, body mass index (kg/m<sup>2</sup>), underlying disease, year of operation, open resection, extent of resection, radicality, operation time, tumor size, locational preference, mitotic rate, NIH risk classification.

| Variables                                                 | Univariate logistic regression |                      |                | Multivariate logistic regression |                     |                |
|-----------------------------------------------------------|--------------------------------|----------------------|----------------|----------------------------------|---------------------|----------------|
|                                                           | B                              | Odds ratio (95% CI)  | <i>P</i> value | B                                | Odds ratio (95% CI) | <i>P</i> value |
| <b>Age, years per increase</b>                            | -0.005                         | 0.995 (0.966-1.025)  | 0.732          |                                  |                     |                |
| <b>Male</b> (vs. female)                                  | 0.370                          | 1.448 (0.732-2.848)  | 0.284          |                                  |                     |                |
| <b>Body mass index</b> (kg/m <sup>2</sup> , per increase) | 0.080                          | 1.084 (0.974-1.206)  | 0.142          |                                  |                     |                |
| <b>Underlying disease</b>                                 | 0.052                          | 1.053 (0.535-2.073)  | 0.881          |                                  |                     |                |
| <b>Year of operation</b>                                  |                                |                      |                |                                  |                     |                |
| Before 2006 vs. from 2006                                 | -0.038                         | 0.963 (0.483-1.920)  | 0.915          |                                  |                     |                |
| <b>Open</b> (vs. laparoscopic) <b>resection</b>           | 0.868                          | 2.381 (1.151-4.927)  | 0.019          | 0.938                            | 2.555 (1.195-5.463) | 0.016          |
| <b>Extent of resection</b>                                |                                |                      |                |                                  |                     |                |
| gastrectomy vs. wedge or enucleation                      | -1.090                         | 0.336 (0.045-2.509)  | 0.288          |                                  |                     |                |
| <b>Radicality, R1</b> (vs. R0 resection)                  | 0.629                          | 1.876 (0.231-15.229) | 0.556          |                                  |                     |                |
| <b>Operation time</b> (minutes, per increase)             | 0.009                          | 1.009 (1.004-1.014)  | <0.001         | 0.010                            | 1.100 (1.005-1.015) | <0.001         |

|                                     |       |                     |       |       |                     |       |
|-------------------------------------|-------|---------------------|-------|-------|---------------------|-------|
| <b>Tumor size</b>                   |       |                     |       |       |                     |       |
| >5 cm (vs. ≤5 cm)                   | 0.893 | 2.443 (1.215-4.912) | 0.012 | 0.983 | 2.627 (1.280-5.575) | 0.009 |
| <b>Locational preference</b>        |       |                     |       |       |                     |       |
| Unfavorable vs. favorable           | 0.721 | 2.057 (0.975-4.341) | 0.058 | 0.966 | 2.627 (1.164-5.927) | 0.020 |
| <b>Mitotic rate (per 50 HPF)</b>    |       |                     |       |       |                     |       |
| >5, ≤10 (vs. ≤5)                    | 0.056 | 1.058 (0.425-2.632) | 0.904 |       |                     |       |
| >10 (vs. ≤5)                        | 0.077 | 1.080 (0.316-3.696) | 0.902 |       |                     |       |
| <b>NIH risk classification</b>      |       |                     |       |       |                     |       |
| High (vs. very low to intermediate) | 0.480 | 1.615 (0.684-3.814) | 0.274 |       |                     |       |

Abbreviations: CI confidence interval; HPF high power field; NIH National Institutes of Health
